# Supplementary material
Source: publisher figshare collection journal article supplement (https://asha.figshare.com/articles/dataset/_/24714399)
Supplement: Supplementary file 2 [file 2]

# **Supplemental Material S1.** Checklist for identifying treatment, acquisition, and generalization targets and implementing principles of acquisition and generalization

Blank Version for SLP Use

## **Acquisition and Generalization Principles Checklist**

|                                                    |  |
|----------------------------------------------------|--|
| <b>Treatment</b> (e.g., MIT, SFA, description(s)): |  |
| <b>Expected generalization behavior:</b>           |  |
| <b>Outcome measures:</b>                           |  |

### **Principles to Facilitate Acquisition**

| <b>Y/N</b> | <b><i>Acquisition Principle</i></b>             | <b><i>How to Implement</i></b> |
|------------|-------------------------------------------------|--------------------------------|
|            | <b>Client-centered clinical decision making</b> |                                |
|            | <b>Dosage</b>                                   |                                |
|            | <b>Reinforcement type and schedule</b>          |                                |

### **Principles to Facilitate Generalization**

| <b>Y/N</b> | <b><i>Generalization Principle</i></b>                               | <b><i>How to Implement</i></b> |
|------------|----------------------------------------------------------------------|--------------------------------|
|            | <b>Include instructional strategies that offer cognitive support</b> |                                |
|            | <b>Use client-led, flexible training</b>                             |                                |
|            | <b>Treat more complex items</b>                                      |                                |
|            | <b>Train the underlying mechanism</b>                                |                                |
|            | <b>Go beyond the single-word level</b>                               |                                |
